# Supplementary material for: Plumbagin, a Biomolecule with (Anti)Osteoclastic Properties
Source: MDPI journal article supplement (doi:10.3390/ijms22052779), 2021-03-09
Supplement: s1 [file s1]

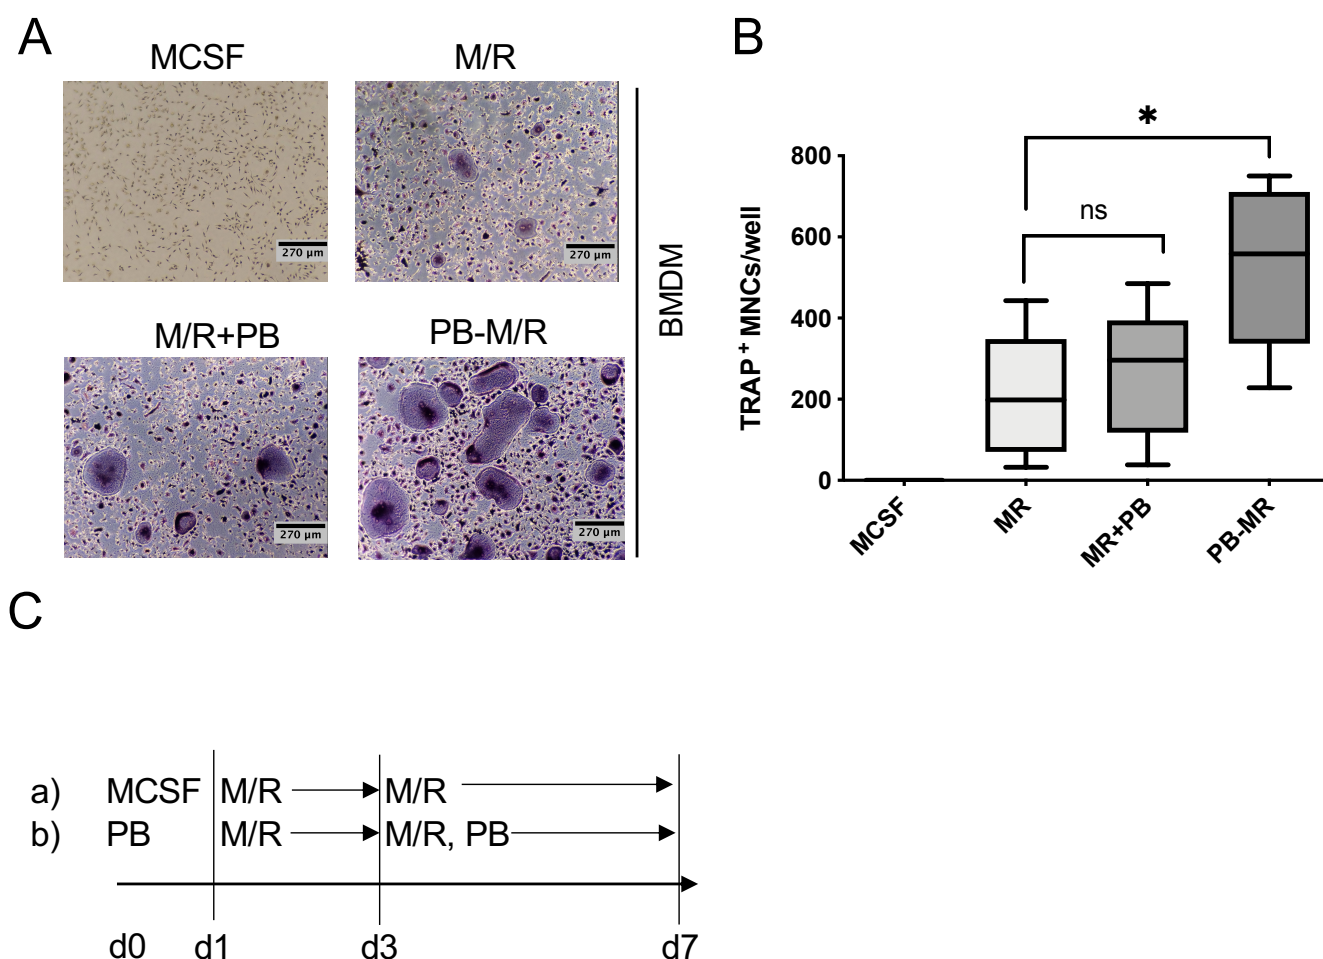

**Fig. S1: Plumbagin does not inhibit osteoclast formation.** (a)(b) BMDM were seeded in a 24 well plate and treated with M-CSF/RANKL or M-CSF/RANKL with 2  $\mu$ M Plumbagin on day 0 (M/R+PB). In case of plumbagin prestimulation, plumbagin was added for 24 h before addition of M-CSF/RANKL (PB-M/R); (c) all other stimulation experiments were performed according to the scheme presented: BMDM were seeded in a 96 or 24 well plate and treated with M-CSF or 2  $\mu$ M plumbagin on day 0. After 24 hours, M-CSF/RANKL was added to the wells of M/R and PB-MR samples. On day 3, cells were stimulated with M-CSF, M-CSF/RANKL or plumbagin/M-CSF/RANKL, respectively, until the osteoclasts were fully differentiated; (a) shows representative pictures (magnification 100X) and (b) presents quantification of TRAP stains (n=5).

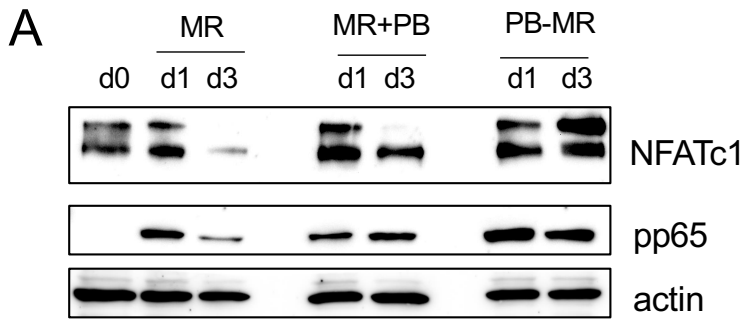

**B**

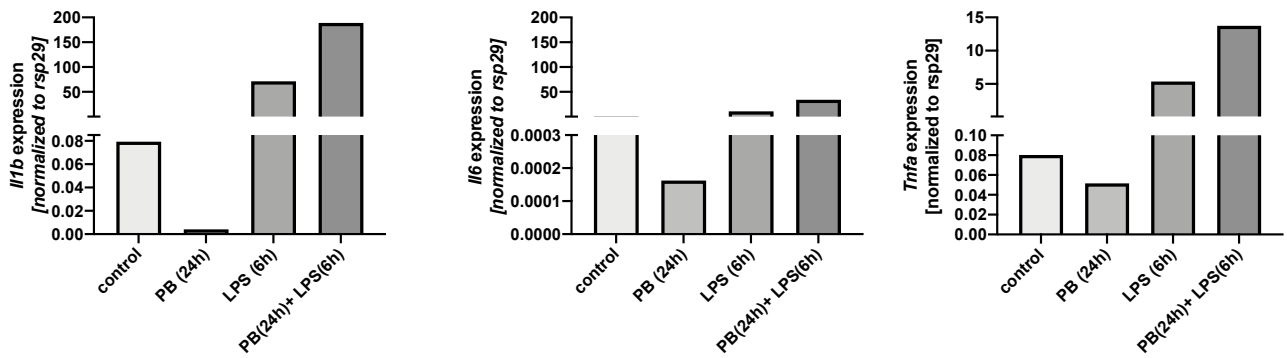

**Fig. S2: Plumbagin exaggerates p65-mediated pathways.** M-CSF/RANKL and simultaneous or pre-stimulation with plumbagin by using antibodies against NFATc1 and phospho-p65 at day 0, day 1 and day 3. Actin was used as a loading control. The blots are typical examples out of three independent experiments; **(b)** BMDM were incubated with plumbagin for 24 h and subsequently stimulated with 100 ng/ml LPS for 6 hours. Cells treated only with LPS or Plumbagin were used as controls. RT-PCR was performed to determine the expression of the pro-inflammatory cytokines *Il6*, *Il1* and *Tnfa*, respectively.

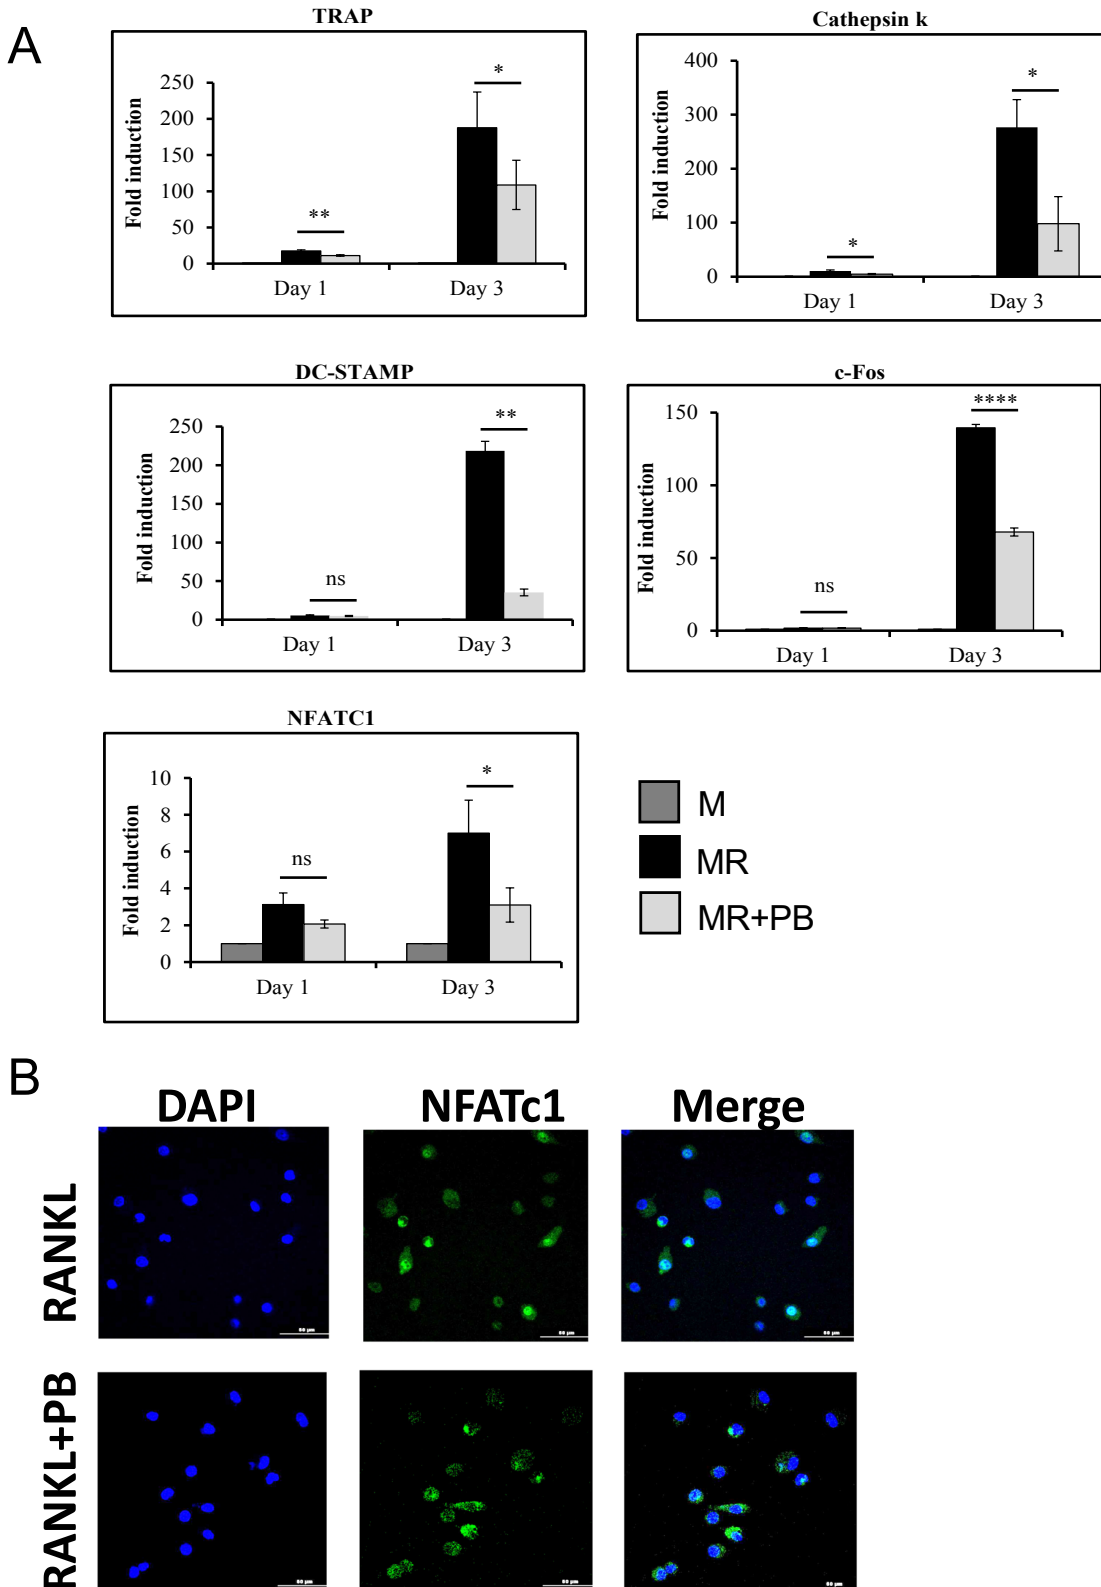

**Fig. S3: Plumbagin inhibits the expression of osteoclast-specific genes and NFATc1 nuclear translocation during osteoclast differentiation of BMCs obtained from Balb/c mice. (a)** Bone marrow-derived osteoclast precursors were cultured with M-CSF (30 ng/ml) and RANKL (40 ng/ml) in the presence or the absence of plumbagin (2  $\mu$ M) for 1 and 3 days. The mRNA expression of TRAP, Cathepsin K, DC-STAMP, c-Fos and NFATc1 genes were evaluated using qRT-PCR. Student t-test was applied to infer the statistical significance between the control and experimental group. Data are expressed as mean $\pm$ SEM. ns-non-significant, \* $P \leq 0.05$ , \*\* $P \leq 0.01$ , \*\*\*\* $P \leq 0.0001$  versus control group; **(b)** RANKL-induced NFATc1 localisation was determined by immunofluorescence microscopy. Briefly, osteoclast precursors were stimulated with RANKL in the presence or absence of plumbagin (2  $\mu$ M) for 48 hours. The cells were fixed, permeabilized, blocked with BSA and stained for NFATc1 (green) and nuclei (blue). Scale bars show 50  $\mu$ m, 60X magnification.

A

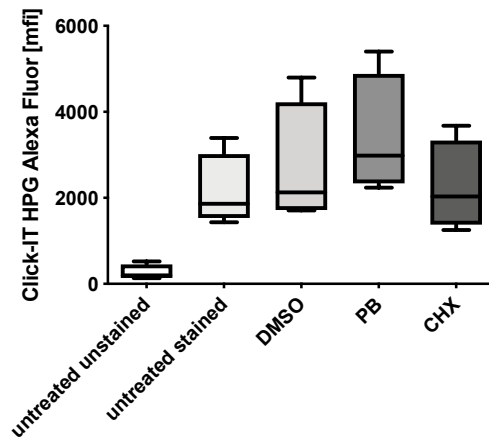

**Fig. S4: Plumbagin pre-treatment triggers protein translation.** (a) translational activity was measured using a Click-IT assay and subsequent measurement of Alexa488 click-labelled HPG containing proteins. Cells were treated for 6 h as indicated before chasing for 30 min with HPG. Alexa488 fluorescent cells were then measured by FACS analysis. Statistical analysis was performed comparing results to the untreated control using a Friedman test. As a control, cells were pre-treated with 10  $\mu$ M cycloheximide for 3 h to block protein translation (n=4).
